# Supplementary material
Source: Research Square preprint supplement (doi:10.21203/rs.3.rs-9656398/v1)
Supplement: Supplementary file 1 [file 82fe1eae0377c9ebe6180f3d.docx]

**Project: Climate Change and Heat Stress: Coping Strategies Among Students**

**Introduction and Consent**

Interviewer: Hey Vikram, thanks so much for taking the time out. As I mentioned over WhatsApp, I’m interviewing 12 students across different halls and departments for my M.Tech research. The focus is on climate change, specifically how students are experiencing heat stress and the coping strategies they’re using. Are you okay with me recording this conversation for my transcript?

**V:** Yeah, absolutely. Happy to help. And honestly, it’s a great topic. The heat this April is already insane.

Interviewer: Thanks, man. Let's dive right in. To start broadly, how are you personally experiencing heat stress on campus right now? What does "heat stress" look and feel like to you on a day-to-day basis?

**V:** Well, for me, heat stress is that constant feeling of physical exhaustion before the day has even really peaked. It’s the difference between just feeling "hot" and feeling completely drained. Usually, by the time I cycle from LBS Hall to the Nalanda classroom complex for my morning classes, I’m already drenched in sweat. But the real stress hits around 2:00 PM. If I have an afternoon lab, my head throbs, and I feel a distinct lack of energy. It feels like the heat is literally sapping my cognitive ability.

**Impact on Daily Routine: Travel and Study**

Interviewer: That physical and cognitive drain is a huge part of what the literature calls heat-induced fatigue. You mentioned cycling to Nalanda. How exactly have these rising temperatures affected your daily routine in terms of travel and study over the recent months?

**V:** It’s completely altered my schedule. Earlier in the semester, around January or February, I wouldn't mind walking to Tech Market or cycling across campus at any time of the day. Now? My travel is strictly utilitarian. I avoid leaving the hostel between 11:00 AM and 4:00 PM unless I absolutely have mandatory attendance.

As for studying, my hostel room becomes an oven by late afternoon because it faces west. The walls absorb the heat and radiate it inside. I can't focus on my assignments or coding practice in that environment. So, my routine has shifted: I pack my bag in the morning and practically live in the Central Library or my department's AC computer lab until the sun goes down. The library is a lifesaver, but finding a seat during peak hot hours is becoming a bloodbath!

**Impact on Sleep and Health**

Interviewer: Yeah, the library AC makes it premium real estate right now. What about the unseen impacts? Has the extreme heat affected your sleep or your general health?

Vikram: Sleep is probably where I’m taking the biggest hit. The ceiling fans in the hostel rooms just circulate hot air. Unless you’ve bought a personal air cooler—which I haven't yet—getting comfortable is really tough. I usually end up waking up two or three times a night sweating. Because my REM sleep is interrupted, I wake up feeling groggy, which feeds right back into that cognitive drain I mentioned earlier.

Health-wise, I had a mild heat-exhaustion scare last week. I played volleyball at the gymkhana grounds at 5:00 PM, thinking the sun was getting lower, but the humidity trapped the heat. I ended up with a massive migraine, nausea, and dehydration that knocked me out for two days. I had to get ORS from the BC Roy hospital pharmacy.

**Coping Strategies in the Context of Climate Change**

Interviewer: I’m sorry to hear that; that sounds brutal. It really highlights how the microclimate here is shifting. We are seeing more extreme heat days now than KGP did a decade ago. In the context of this broader climate change, what specific strategies are you using to cope with heat stress?

**V:** Short-term, I’ve become religious about hydration. I don't just carry water anymore; I carry water mixed with electrolytes or sattu (roasted gram flour) drinks that you get near the campus gates. I've also changed my wardrobe completely—only light-colored, loose cotton clothes. I’ve even swallowed my pride and started carrying a UV-protection umbrella when I cycle, which a lot of guys are starting to do now.

Long-term, and thinking about climate change, my coping strategy is more psychological. I try to accept that this is the "new normal." I’m actively choosing electives and projects that let me work indoors or do computational work rather than field surveys.

Interviewer: That’s a really interesting point—adapting your academic choices to the physical environment. Do you think the student community as a whole is recognizing this as a climate change issue, or just dismissing it as "summer in Bengal"?

**V:** I think it's transitioning. Seniors tell us that April was always hot, but the intensity and the humidity spikes feel different now. The heatwaves are longer. Students are definitely talking about the loss of tree cover due to new construction on campus. When they cut down old trees to build a new block, you instantly feel the loss of that shade. There's a growing realization that global warming is happening right here on our cycling paths, not just melting ice caps on the news.

**Institutional Support and Final Thoughts**

Interviewer: As we wrap up, what do you think the institute or the halls could do to help students implement better coping strategies?

V: A few immediate things. First, the mess menus need a summer overhaul. Serving heavy, oily curries in 42-degree heat is a recipe for indigestion. We need more watermelons, curd, buttermilk, and lighter meals. Second, the administration should consider adjusting academic
